# Supplementary material
Source: Springer Nature journal article supplement (https://www.springermedizin.de/resource/supplementary/13075_2009_2770_MOESM2_ESM.pdf/9692850)

# Temporal and concentration effects of PPS on 35S-Glycosaminoglycan biosynthesis by MPC in 5, 7 and 10 day micromass cultures.

▨ 5 days ■ 7 days ■ 10 days

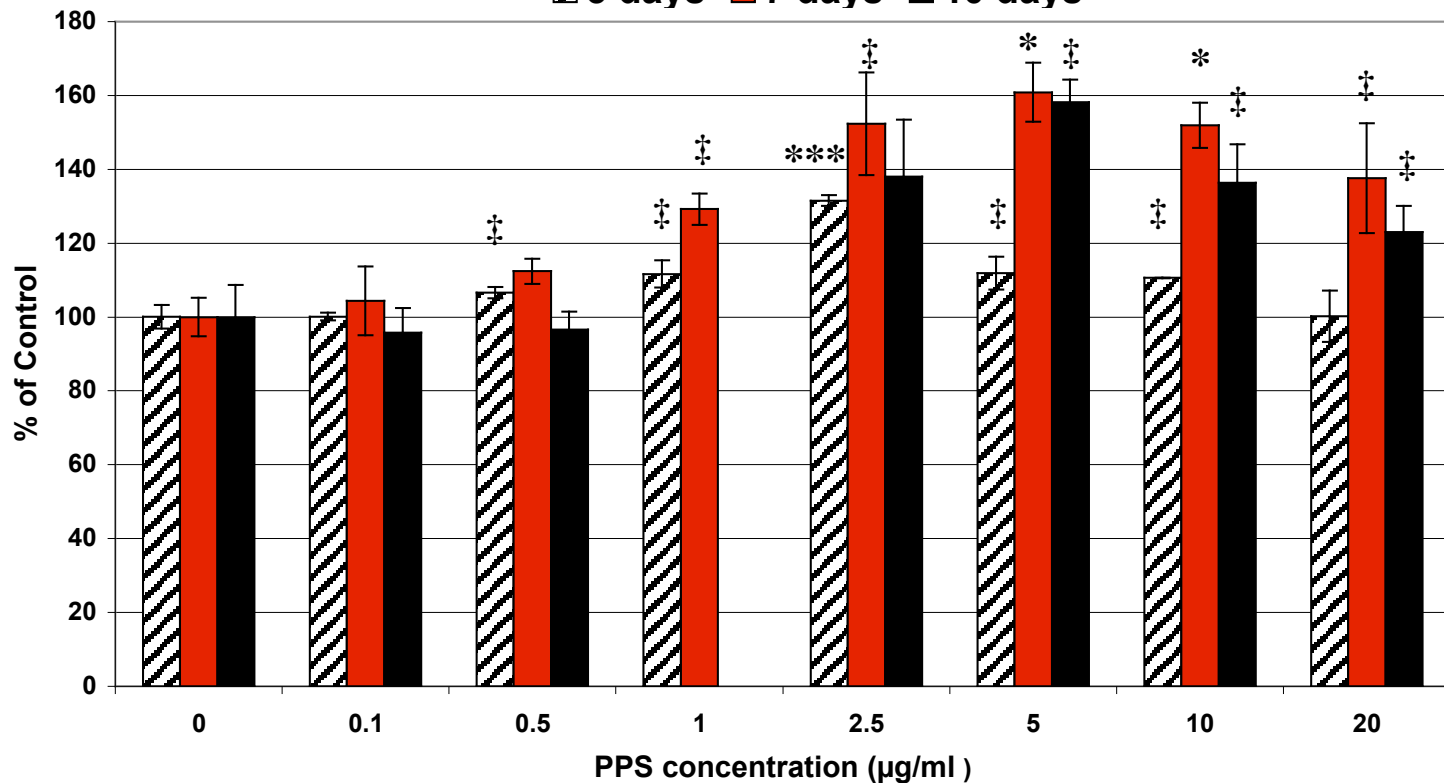

Supplement: MOESM2 [file 9692850]
